# Supplementary material for: Assessing IRS performance in a gender-integrated vector control programme on Bioko Island, Equatorial Guinea, 2010–2021
Source: PubMed Central journal article supplement (PMC10599007; doi:10.1186/s12936-023-04755-4), 2023-10-25
Supplement: 12936_2023_4755_MOESM1_ESM.pdf [file 12936_2023_4755_MOESM1_ESM.pdf]

| Characteristic    | Beta  | 95% CI <sup>1</sup> | p-value      |
|-------------------|-------|---------------------|--------------|
| Gender            |       |                     |              |
| Male              | —     | —                   |              |
| Female            | 0.07  | 0.01, 0.12          | <b>0.014</b> |
| Attendance        |       |                     |              |
| Optimal           | —     | —                   |              |
| Acceptable        | 0.04  | -0.02, 0.10         | 0.2          |
| Low               | -0.05 | -0.12, 0.01         | 0.11         |
| Longevity         |       |                     |              |
| 1-2 Rounds worked | —     | —                   |              |
| 3-6 Rounds worked | -0.06 | -0.13, 0.01         | 0.082        |
| 7-9 Rounds worked | -0.05 | -0.14, 0.04         | 0.3          |
| 10+ Rounds worked | 0.05  | -0.03, 0.13         | 0.2          |

<sup>1</sup> CI = Confidence Interval
