# Supplementary material for: Assessing IRS performance in a gender-integrated vector control programme on Bioko Island, Equatorial Guinea, 2010–2021
Source: PubMed Central journal article supplement (PMC10599007; doi:10.1186/s12936-023-04755-4), 2023-10-25
Supplement: 12936_2023_4755_MOESM2_ESM.pdf [file 12936_2023_4755_MOESM2_ESM.pdf]

| Characteristic    | Beta  | 95% CI <sup>1</sup> | p-value      |
|-------------------|-------|---------------------|--------------|
| Gender            |       |                     |              |
| Male              | —     | —                   |              |
| Female            | -0.22 | -0.56, 0.12         | 0.2          |
| Attendance        |       |                     |              |
| Optimal           | —     | —                   |              |
| Acceptable        | -0.07 | -0.46, 0.32         | 0.7          |
| Low               | 0.05  | -0.37, 0.47         | 0.8          |
| Longevity         |       |                     |              |
| 1-2 Rounds worked | —     | —                   |              |
| 3-6 Rounds worked | -0.41 | -0.84, 0.02         | 0.059        |
| 7-9 Rounds worked | -0.89 | -1.5, -0.33         | <b>0.002</b> |
| 10+ Rounds worked | 0.04  | -0.44, 0.53         | 0.9          |

<sup>1</sup> CI = Confidence Interval
