# Supplementary material for: Assessing IRS performance in a gender-integrated vector control programme on Bioko Island, Equatorial Guinea, 2010–2021
Source: PubMed Central journal article supplement (PMC10599007; doi:10.1186/s12936-023-04755-4), 2023-10-25
Supplement: 12936_2023_4755_MOESM3_ESM.pdf [file 12936_2023_4755_MOESM3_ESM.pdf]

| Characteristic    | Beta  | 95% CI <sup>1</sup> | p-value      |
|-------------------|-------|---------------------|--------------|
| Gender            |       |                     |              |
| Male              | —     | —                   |              |
| Female            | -0.12 | -0.20, -0.04        | <b>0.003</b> |
| Attendance        |       |                     |              |
| Optimal           | —     | —                   |              |
| Acceptable        | -0.04 | -0.14, 0.05         | 0.4          |
| Low               | 0.08  | -0.02, 0.18         | 0.11         |
| Longevity         |       |                     |              |
| 1-2 Rounds worked | —     | —                   |              |
| 3-6 Rounds worked | -0.05 | -0.15, 0.06         | 0.4          |
| 7-9 Rounds worked | -0.19 | -0.32, -0.05        | <b>0.006</b> |
| 10+ Rounds worked | -0.05 | -0.17, 0.07         | 0.4          |

<sup>1</sup> CI = Confidence Interval
