# Supplementary material for: Assessing IRS performance in a gender-integrated vector control programme on Bioko Island, Equatorial Guinea, 2010–2021
Source: PubMed Central journal article supplement (PMC10599007; doi:10.1186/s12936-023-04755-4), 2023-10-25
Supplement: 12936_2023_4755_MOESM4_ESM.pdf [file 12936_2023_4755_MOESM4_ESM.pdf]

| Characteristic    | Beta  | 95% CI <sup>1</sup> | p-value          |
|-------------------|-------|---------------------|------------------|
| Gender            |       |                     |                  |
| Male              | —     | —                   |                  |
| Female            | -0.09 | -0.15, -0.02        | <b>0.007</b>     |
| Attendance        |       |                     |                  |
| Optimal           | —     | —                   |                  |
| Acceptable        | 0.03  | -0.05, 0.11         | 0.5              |
| Low               | 0.03  | -0.05, 0.11         | 0.5              |
| Longevity         |       |                     |                  |
| 1-2 Rounds worked | —     | —                   |                  |
| 3-6 Rounds worked | -0.17 | -0.27, -0.07        | <b>0.001</b>     |
| 7-9 Rounds worked | -0.20 | -0.31, -0.09        | <b>&lt;0.001</b> |
| 10+ Rounds worked | -0.13 | -0.23, -0.03        | <b>0.008</b>     |
| Age Group         |       |                     |                  |
| < 25 years        | —     | —                   |                  |
| 25-34 years       | 0.03  | -0.12, 0.18         | 0.7              |
| 35+ years         | 0.14  | -0.01, 0.30         | 0.068            |
| Education Level   |       |                     |                  |
| Primary school    | —     | —                   |                  |
| Lower secondary   | -0.04 | -0.12, 0.05         | 0.4              |
| Upper secondary   | -0.18 | -0.31, -0.06        | <b>0.005</b>     |
| Higher education  | -0.22 | -0.37, -0.08        | <b>0.002</b>     |

<sup>1</sup> CI = Confidence Interval
