# Supplementary material for: Assessing IRS performance in a gender-integrated vector control programme on Bioko Island, Equatorial Guinea, 2010–2021
Source: PubMed Central journal article supplement (PMC10599007; doi:10.1186/s12936-023-04755-4), 2023-10-25
Supplement: 12936_2023_4755_MOESM5_ESM.pdf [file 12936_2023_4755_MOESM5_ESM.pdf]

| Characteristic    | Beta  | 95% CI <sup>1</sup> | p-value          |
|-------------------|-------|---------------------|------------------|
| Gender            |       |                     |                  |
| Male              | —     | —                   |                  |
| Female            | -0.43 | -0.85, 0.00         | <b>0.048</b>     |
| Attendance        |       |                     |                  |
| Optimal           | —     | —                   |                  |
| Acceptable        | 1.9   | 1.4, 2.5            | <b>&lt;0.001</b> |
| Low               | 1.0   | 0.43, 1.6           | <b>&lt;0.001</b> |
| Longevity         |       |                     |                  |
| 1-2 Rounds worked | —     | —                   |                  |
| 3-6 Rounds worked | -0.10 | -0.78, 0.59         | 0.8              |
| 7-9 Rounds worked | -0.10 | -0.84, 0.63         | 0.8              |
| 10+ Rounds worked | 0.88  | 0.23, 1.5           | <b>0.008</b>     |
| Age Group         |       |                     |                  |
| < 25 years        | —     | —                   |                  |
| 25-34 years       | 0.32  | -0.68, 1.3          | 0.5              |
| 35+ years         | 1.0   | -0.06, 2.0          | 0.064            |
| Education Level   |       |                     |                  |
| Primary school    | —     | —                   |                  |
| Lower secondary   | 0.54  | -0.04, 1.1          | 0.066            |
| Upper secondary   | 0.34  | -0.52, 1.2          | 0.4              |
| Higher education  | 0.17  | -0.79, 1.1          | 0.7              |

<sup>1</sup> CI = Confidence Interval
