# Supplementary material for: Assessing IRS performance in a gender-integrated vector control programme on Bioko Island, Equatorial Guinea, 2010–2021
Source: PubMed Central journal article supplement (PMC10599007; doi:10.1186/s12936-023-04755-4), 2023-10-25
Supplement: 12936_2023_4755_MOESM6_ESM.pdf [file 12936_2023_4755_MOESM6_ESM.pdf]

| Characteristic    | Beta  | 95% CI <sup>1</sup> | p-value      |
|-------------------|-------|---------------------|--------------|
| Gender            |       |                     |              |
| Male              | —     | —                   |              |
| Female            | -0.02 | -0.12, 0.08         | 0.7          |
| Attendance        |       |                     |              |
| Optimal           | —     | —                   |              |
| Acceptable        | 0.47  | 0.34, 0.60          | <0.001       |
| Low               | 0.23  | 0.10, 0.36          | <0.001       |
| Longevity         |       |                     |              |
| 1-2 Rounds worked | —     | —                   |              |
| 3-6 Rounds worked | 0.14  | -0.02, 0.30         | 0.094        |
| 7-9 Rounds worked | 0.16  | -0.01, 0.34         | 0.070        |
| 10+ Rounds worked | 0.35  | 0.20, 0.51          | <0.001       |
| Age Group         |       |                     |              |
| < 25 years        | —     | —                   |              |
| 25-34 years       | 0.07  | -0.17, 0.31         | 0.6          |
| 35+ years         | 0.12  | -0.12, 0.37         | 0.3          |
| Education Level   |       |                     |              |
| Primary school    | —     | —                   |              |
| Lower secondary   | 0.17  | 0.04, 0.31          | <b>0.014</b> |
| Upper secondary   | 0.26  | 0.06, 0.46          | <b>0.012</b> |
| Higher education  | 0.26  | 0.04, 0.49          | <b>0.024</b> |

<sup>1</sup> CI = Confidence Interval
